# Supplementary material
Source: PubMed Central journal article supplement (PMC6870901)
Supplement: HBM-30-299-s001.pdf [file HBM-30-299-s001.pdf]

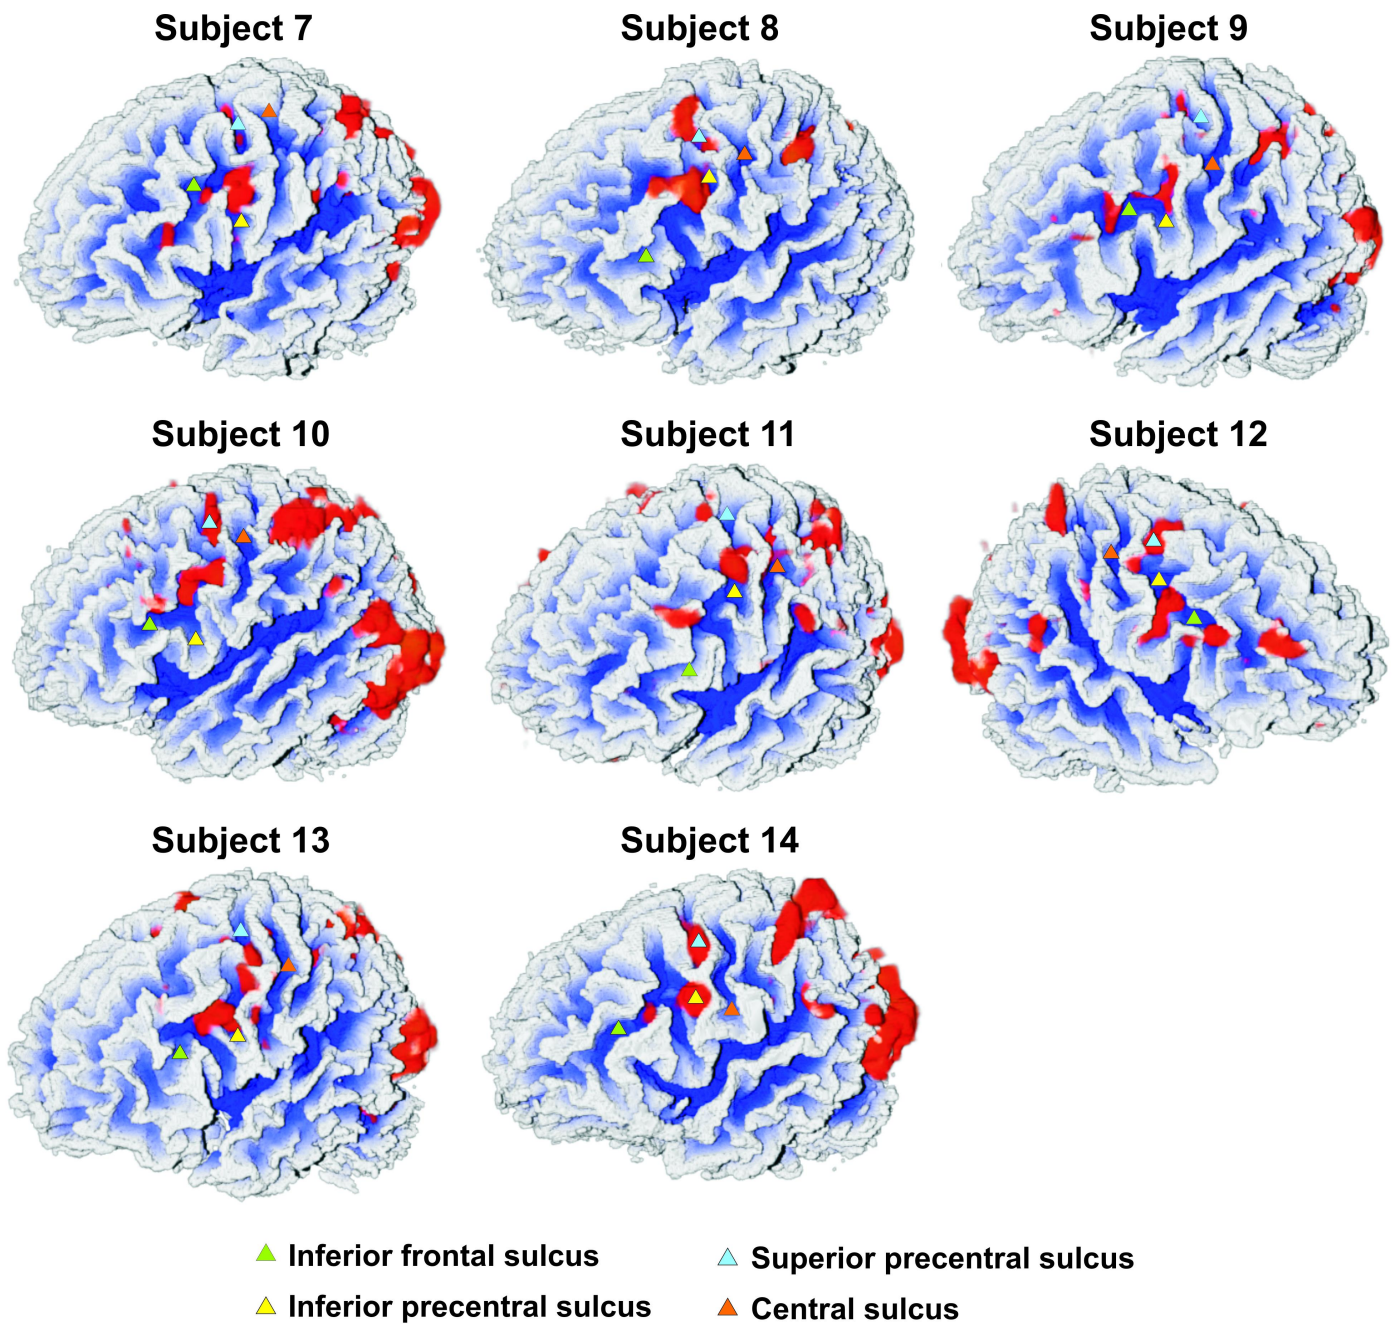

Suppl. Fig. 1. Frontolateral views of white-matter segmentations with functional imaging maps overlaid for Subjects 7 to 14. Relevant sulci are highlighted by triangles. Note the consistent activation at the junction of the inferior precentral sulcus and the inferior frontal sulcus.
